# Supplementary material
Source: PubMed Central journal article supplement (PMC5997270)

**SUPPLEMENTARY MATERIAL, FIGURE 1: Modified Newcastle-Ottawa Quality Assessment Scale (Cohort Studies)**

**Paper:**

| <b>Assessment of quality of a cohort study – Newcastle Ottawa Scale</b>                                                                                    |   |                          |
|------------------------------------------------------------------------------------------------------------------------------------------------------------|---|--------------------------|
| <b>Selection</b> (tick one box in each section)                                                                                                            |   |                          |
| 1. Representativeness of the intervention cohort                                                                                                           |   |                          |
| a) Truly representative of the general TBI population                                                                                                      | * | <input type="checkbox"/> |
| b) Somewhat representative of the general TBI population                                                                                                   | * | <input type="checkbox"/> |
| c) Selected group of patients                                                                                                                              |   | <input type="checkbox"/> |
| d) No description of the derivation of the cohort                                                                                                          |   | <input type="checkbox"/> |
| 2. Selection of the non intervention cohort                                                                                                                |   |                          |
| a) Drawn from the same community as the intervention cohort                                                                                                | * | <input type="checkbox"/> |
| b) Drawn from a different source                                                                                                                           |   | <input type="checkbox"/> |
| c) No description of the derivation of the non intervention cohort                                                                                         |   | <input type="checkbox"/> |
| 3. Ascertainment of intervention                                                                                                                           |   |                          |
| a) Secure record (e.g. health care record)                                                                                                                 | * | <input type="checkbox"/> |
| b) Structured interview                                                                                                                                    | * | <input type="checkbox"/> |
| c) Written self report                                                                                                                                     |   | <input type="checkbox"/> |
| d) Other / no description                                                                                                                                  |   | <input type="checkbox"/> |
| <b>Comparability</b> (tick one or all boxes, as appropriate)                                                                                               |   |                          |
| 1. Comparability of cohorts on the basis of the design or analysis                                                                                         |   |                          |
| a) Study controls for <b>age</b>                                                                                                                           | * | <input type="checkbox"/> |
| b) Study controls for <b>Glasgow Coma Scale motor or total score</b>                                                                                       | * | <input type="checkbox"/> |
| c) Study controls for <b>pupillary reactivity</b>                                                                                                          | * | <input type="checkbox"/> |
| <b>Outcome</b> (tick one box in each section)                                                                                                              |   |                          |
| 1. Assessment of outcome                                                                                                                                   |   |                          |
| a) Independent blind assessment                                                                                                                            | * | <input type="checkbox"/> |
| b) Record linkage                                                                                                                                          | * | <input type="checkbox"/> |
| c) Self report                                                                                                                                             |   | <input type="checkbox"/> |
| d) Other / no description                                                                                                                                  |   | <input type="checkbox"/> |
| 2. Was follow up long enough for outcomes to occur                                                                                                         |   |                          |
| a) Yes, if median duration of follow-up $\geq$ 6 month                                                                                                     | * | <input type="checkbox"/> |
| b) No, if median duration of follow-up $<$ 6 months                                                                                                        |   | <input type="checkbox"/> |
| 3. Adequacy of follow up of cohorts                                                                                                                        |   |                          |
| a) Complete follow up: all subjects accounted for                                                                                                          | * | <input type="checkbox"/> |
| b) Subjects lost to follow up unlikely to introduce bias: number lost $\leq$ 20%, or description of those lost suggesting no different from those followed | * | <input type="checkbox"/> |
| c) Follow up rate $<$ 80% (select an adequate %) and no description of those lost                                                                          |   | <input type="checkbox"/> |
| d) No statement                                                                                                                                            |   | <input type="checkbox"/> |

Note: A study can be awarded a maximum of one star for each numbered item within the Selection and Outcome categories. A maximum of two stars can be given for Comparability

**TOTAL SCORE: \_\_/9**

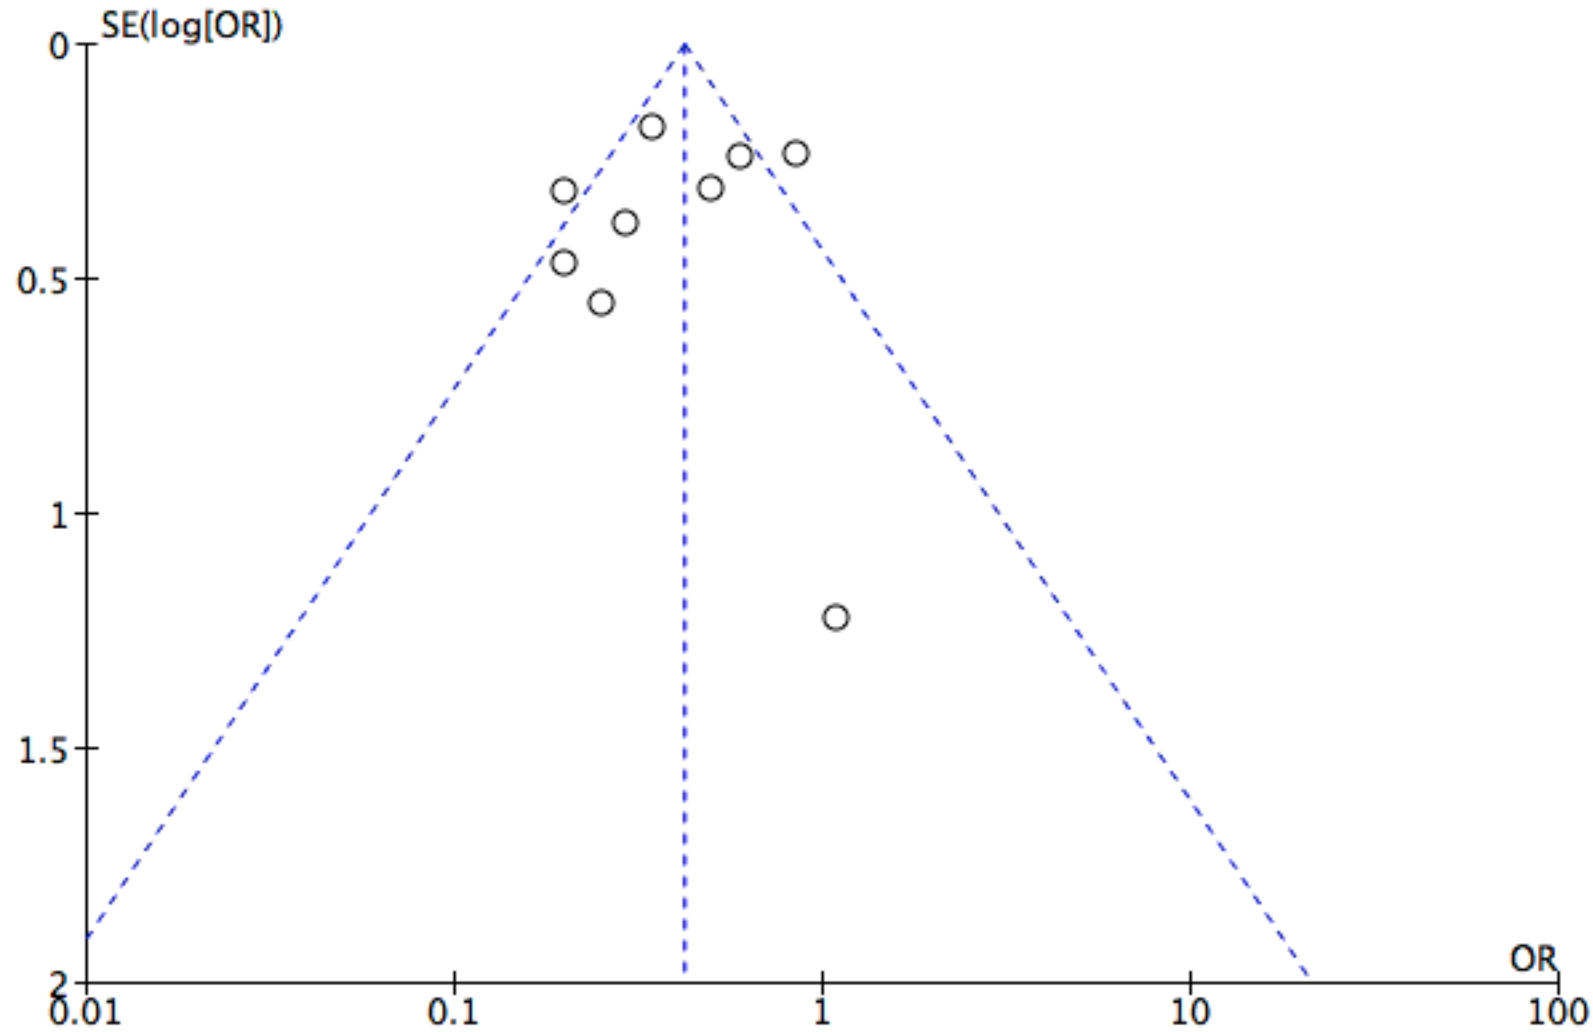

Supplement: NIHMS946298-supplement-supplement_1.pdf [file NIHMS946298-supplement-supplement_1.pdf]
